# Supplementary material for: Comparative genomic analysis of monosporidial and monoteliosporic cultures for unraveling the complexity of molecular pathogenesis of Tilletia indica pathogen of wheat
Source: PubMed Central journal article supplement (PMC6547692; doi:10.1038/s41598-019-44464-0), 2019-06-03
Supplement: 41598_2019_44464_MOESM2_ESM.pdf [file 41598_2019_44464_MOESM2_ESM.pdf]

# Comparative genomic analysis of monosporial and monoteliosporic cultures for unraveling the complexity of molecular pathogenesis of *Tilletia indica* pathogen of wheat

Pallavi Mishra<sup>a,b,c#</sup>, Ranjeet Maurya<sup>a#</sup>, Vijai K. Gupta<sup>d</sup>, Pramod W. Ramteke<sup>e\*</sup>, Soma S. Marla<sup>b\*</sup>, Anil Kumar<sup>a,f\*</sup>

## AUTHOR AFFILIATIONS

<sup>a</sup>Department of Molecular Biology and Genetic Engineering, College of Basic Sciences and Humanities, G. B. Pant University of Agriculture and Technology, Pantnagar, India.

<sup>b</sup>Division of Genomic Resources, ICAR-National Bureau of Plant Genetic Resources, New Delhi, India.

<sup>c</sup>Department of Computational Biology and Bioinformatics, Sam Higginbottom University of Agriculture, Technology and Sciences, Allahabad, India.

<sup>d</sup>Department of Chemistry and Biotechnology, ERA Chair of Green Chemistry, Tallinn University of Technology, Tallinn, Estonia.

<sup>e</sup>Department of Biological Sciences, Sam Higginbottom University of Agriculture, Technology and Sciences, Allahabad, India.

<sup>f</sup>Rani Lakshmi Bai Central Agricultural University, Jhansi, India.

\* To whom correspondence should be addressed: **anilkumar.mbge@gmail.com, pwranteke@gmail.com, soma.marla@icar.gov.in**

## Supplementary Data 1

Supplementary Data 1: The frequency of the most common motif appears predominately is displayed for each developmental case.

| <b>Predominant repeats</b> | <b>monoteliospori<br/>c TiK_1</b> | <b>Monosporidial<br/>PSWKBGH_1</b> | <b>Monosporidial<br/>PSWKBGH_2</b> | <b>Dikaryon<br/>PSWKBGD_1_3</b> |
|----------------------------|-----------------------------------|------------------------------------|------------------------------------|---------------------------------|
| <b>AG/CT</b>               | 1131                              | 1217                               | 1163                               | 1388                            |
| <b>A/T</b>                 | 668                               | 1049                               | 963                                | 1130                            |
| <b>C/G</b>                 | 641                               | 1113                               | 1192                               | 1763                            |
| <b>AGC/CTG</b>             | 516                               | 600                                | 537                                | 620                             |
| <b>AGG/CCT</b>             | 494                               | 562                                | 536                                | 640                             |
| <b>AC/GT</b>               | 412                               | 416                                | 472                                | 487                             |
| <b>ACC/GGT</b>             | 337                               | 347                                | 376                                | 378                             |
| <b>AAC/GTT</b>             | 263                               | 272                                | 270                                | 321                             |
| <b>AAG/CTT</b>             | 223                               | 253                                | 252                                | 298                             |
| <b>CCG/CGG</b>             | 203                               | 259                                | 197                                | 245                             |
| <b>ATC/ATG</b>             | 198                               | 199                                | 200                                | 261                             |
| <b>ACG/CGT</b>             | 190                               | 277                                | 227                                | 268                             |
| <b>CG/CG</b>               | 52                                | 64                                 | 46                                 | 58                              |
| <b>ACTC/AGTG</b>           | 50                                | 55                                 | 59                                 | 68                              |
| <b>AAGG/CCTT</b>           | 27                                | 32                                 | 30                                 | 41                              |
| <b>ACT/AGT</b>             | 22                                | 19                                 | 33                                 | 31                              |
| <b>AT/AT</b>               | 18                                | 18                                 | 12                                 | 20                              |
| <b>AGGG/CCCT</b>           | 18                                | 35                                 | 27                                 | 18                              |
| <b>AACCCT/AGGGTT</b>       | 12                                | 39                                 | 73                                 | 15                              |
| <b>AAAG/CTTT</b>           | 8                                 | 10                                 | 44                                 | 22                              |
| <b>ACAG/CTGT</b>           | 8                                 | 50                                 | 14                                 | 13                              |

## Supplementary Data 2

Supplementary Data 2: Protein family annotation shows the distribution of most abundant protein class assigned to *T. indica* genes.

| <b>Category name (Accession)</b>                            | <b>Genes</b> | <b>Percent of gene hit against total genes</b> | <b>Percent of gene hit against total Protein Class hits</b> |
|-------------------------------------------------------------|--------------|------------------------------------------------|-------------------------------------------------------------|
| extracellular matrix protein (PC00102)                      | 4            | 0.10%                                          | 0.20%                                                       |
| cytoskeletal protein (PC00085)                              | 58           | 1.90%                                          | 2.80%                                                       |
| transporter (PC00227)                                       | 148          | 4.80%                                          | 7.20%                                                       |
| transmembrane receptor regulatory/adaptor protein (PC00226) | 9            | 0.30%                                          | 0.40%                                                       |
| transferase (PC00220)                                       | 281          | 9.10%                                          | 13.70%                                                      |
| oxidoreductase (PC00176)                                    | 197          | 6.40%                                          | 9.60%                                                       |
| lyase (PC00144)                                             | 60           | 1.90%                                          | 2.90%                                                       |
| cell adhesion molecule (PC00069)                            | 1            | 0.00%                                          | 0.00%                                                       |
| ligase (PC00142)                                            | 98           | 3.20%                                          | 4.80%                                                       |
| nucleic acid binding (PC00171)                              | 408          | 13.20%                                         | 19.90%                                                      |
| signaling molecule (PC00207)                                | 14           | 0.50%                                          | 0.70%                                                       |
| enzyme modulator (PC00095)                                  | 125          | 4.00%                                          | 6.10%                                                       |
| calcium-binding protein (PC00060)                           | 27           | 0.90%                                          | 1.30%                                                       |
| defense/immunity protein (PC00090)                          | 1            | 0.00%                                          | 0.00%                                                       |
| hydrolase (PC00121)                                         | 332          | 10.70%                                         | 16.20%                                                      |
| transfer/carrier protein (PC00219)                          | 45           | 1.50%                                          | 2.20%                                                       |
| membrane traffic protein (PC00150)                          | 69           | 2.20%                                          | 3.40%                                                       |
| transcription factor (PC00218)                              | 81           | 2.60%                                          | 3.90%                                                       |
| chaperone (PC00072)                                         | 25           | 0.80%                                          | 1.20%                                                       |
| cell junction protein (PC00070)                             | 2            | 0.10%                                          | 0.10%                                                       |
| structural protein (PC00211)                                | 2            | 0.10%                                          | 0.10%                                                       |
| isomerase (PC00135)                                         | 40           | 1.30%                                          | 1.90%                                                       |
| receptor (PC00197)                                          | 24           | 0.80%                                          | 1.20%                                                       |

#### Supplementary Data 4

Supplementary Data 4: Virulence associated genes (VAGs) belonging to *T. indica* genome sequence producing high-scoring segments pairs.

| <b>S.No.</b> | <b>Gene phenotype</b>                | <b>Number of VAGs</b> |
|--------------|--------------------------------------|-----------------------|
| 1            | loss_of_pathogenicity                | 33                    |
| 2            | unaffected_pathogenicity             | 50                    |
| 3            | reduced_virulence                    | 90                    |
| 4            | lethal                               | 22                    |
| 5            | increased_virulence (hypervirulence) | 4                     |
| 6            | resistance_to_chemical               | 1                     |
| 7            | multiple outcome                     | 20                    |
|              | <b>Total VAGs</b>                    | <b>220</b>            |

## Supplementary data 5

Supplementary data 5: The PHI-base accessions assigned to *T. indica* genes hits to other pathogenic fungal organism.

| <b>Organisms</b>               | <b>No. of hits of <i>T. Indica</i></b> |
|--------------------------------|----------------------------------------|
| Fusarium_graminearum           | 58                                     |
| Magnaporthe_oryzae             | 34                                     |
| Cryptococcus_neoformans        | 24                                     |
| Ustilago_maydis                | 20                                     |
| Aspergillus_fumigatus          | 19                                     |
| Candida_albicans               | 12                                     |
| Parastagonospora_nodorum       | 8                                      |
| Colletotrichum_gloeosporioides | 6                                      |
| Cryptococcus_gattii            | 4                                      |
| Colletotrichum_lindemuthianum  | 3                                      |
| Edwardsiella_ictaluri          | 3                                      |
| Leptosphaeria_maculans         | 3                                      |
| Saccharomyces_cerevisiae       | 3                                      |
